# Supplementary material
Source: HighWire-hosted journal article supplement (https://jitc.bmj.com/content/10/3/e004306)
Supplement: inline-supplementary-material-2 [file inline-supplementary-material-2.xlsx]

## Sheet: Supple. Table S1
Table S1. topGO Analysis. Output from topGO Gene Ontology enrichment analysis indicating expected versus actual genes and false discovery rate adjusted p-values (p.adj) associated with figure 2B.

## Sheet: D3_treatment_ATRi_D3_vs_Vehicle
GO.ID	Term	Annotated	Significant	Expected	weightFisher	p.adj
GO:0051607	defense response to virus	224	13	0.89	3.5e-08	0.000553385
GO:0060700	regulation of ribonuclease activity	11	4	0.04	7.2e-08	0.000569196
GO:0035458	cellular response to interferon-beta	48	5	0.19	1.2e-06	0.0063244
GO:0045071	negative regulation of viral genome repl...	52	5	0.21	1.9e-06	0.00751022
GO:0009617	response to bacterium	604	14	2.39	2.8e-06	0.00885416

## Sheet: D3_treatment_RT_D3_vs_Vehicle_D
GO.ID	Term	Annotated	Significant	Expected	weightFisher	p.adj
GO:0006335	DNA replication-dependent nucleosome ass...	31	10	0.32	4.3e-13	6.79873e-09
GO:0009617	response to bacterium	604	23	6.31	1.4e-09	1.10677e-05
GO:0051607	defense response to virus	224	17	2.34	1.6e-08	8.43253e-05
GO:0045653	negative regulation of megakaryocyte dif...	15	5	0.16	3.2e-07	0.00126488
GO:0045071	negative regulation of viral genome repl...	52	7	0.54	1.1e-06	0.00347842
GO:0060700	regulation of ribonuclease activity	11	4	0.11	3.6e-06	0.0094866
GO:0006336	DNA replication-independent nucleosome a...	25	5	0.26	5.3e-06	0.0119712
GO:0035457	cellular response to interferon-alpha	14	4	0.15	1.1e-05	0.0217401
GO:0030240	skeletal muscle thin filament assembly	6	3	0.06	2.2e-05	0.0386491

## Sheet: D3_treatment_RT_ATRi_D3_vs_Vehi
GO.ID	Term	Annotated	Significant	Expected	weightFisher	p.adj
GO:0051607	defense response to virus	224	32	4.59	2.3e-14	3.63653e-10
GO:0045071	negative regulation of viral genome repl...	52	13	1.07	2.7e-11	2.13449e-07
GO:0009617	response to bacterium	604	44	12.39	5.7e-11	3.00409e-07
GO:0045087	innate immune response	637	61	13.06	8.8e-11	3.47842e-07
GO:0019835	cytolysis	24	9	0.49	5.7e-10	1.80245e-06
GO:0035458	cellular response to interferon-beta	48	11	0.98	2.6e-09	6.85143e-06
GO:0060700	regulation of ribonuclease activity	11	6	0.23	3e-08	6.77614e-05
GO:0006335	DNA replication-dependent nucleosome ass...	31	8	0.64	1.5e-07	0.000296456
GO:0002218	activation of innate immune response	43	10	0.88	6.7e-06	0.0117704
GO:0032729	positive regulation of interferon-gamma ...	67	9	1.37	8.6e-06	0.0135975
GO:0002223	stimulatory C-type lectin receptor signa...	4	3	0.08	3.4e-05	0.0488704

## Sheet: D10_treatment_ATRi_D10_vs_Vehic
GO.ID	Term	Annotated	Significant	Expected	weightFisher	p.adj
GO:0006335	DNA replication-dependent nucleosome ass...	31	13	0.94	1.9e-12	3.00409e-08
GO:0031424	keratinization	33	9	1	4e-07	0.0031622
GO:0061436	establishment of skin barrier	21	7	0.64	1.8e-06	0.0094866
GO:0045653	negative regulation of megakaryocyte dif...	15	6	0.45	3e-06	0.0113839
GO:0070830	bicellular tight junction assembly	64	10	1.94	3.6e-06	0.0113839
GO:0016338	calcium-independent cell-cell adhesion v...	19	6	0.58	1.5e-05	0.0395275

## Sheet: D10_treatment_RT_D10_vs_Vehicle
GO.ID	Term	Annotated	Significant	Expected	weightFisher	p.adj

## Sheet: D10_treatment_RT_ATRi_D10_vs_Ve
GO.ID	Term	Annotated	Significant	Expected	weightFisher	p.adj
GO:0031424	keratinization	33	14	0.94	9.2e-14	1.45461e-09
GO:0061436	establishment of skin barrier	21	9	0.6	2.4e-09	1.89732e-05
GO:0019835	cytolysis	24	8	0.68	2e-07	0.00105407
GO:0035458	cellular response to interferon-beta	48	10	1.36	7.7e-07	0.00304362
GO:0002476	antigen processing and presentation of e...	21	7	0.6	1.2e-06	0.00379464
GO:0070830	bicellular tight junction assembly	64	10	1.82	2.1e-06	0.00553385
GO:0016338	calcium-independent cell-cell adhesion v...	19	6	0.54	1e-05	0.0225871
GO:0002009	morphogenesis of an epithelium	489	33	13.9	1.6e-05	0.031622
GO:0010482	regulation of epidermal cell division	3	3	0.09	2.3e-05	0.0388088
GO:0030216	keratinocyte differentiation	106	26	3.01	2.5e-05	0.0388088
GO:0006508	proteolysis	1511	55	42.95	2.7e-05	0.0388088
